# Supplementary material for: Theoretical study of the reaction mechanism of the uncatalyzed epoxidation of alkenes by iodosylbenzeneElectronic supplementary information (ESI) available: B3LYP optimized geometries (Cartesian coordinates) and total energies for compounds 1 to 9. See http://www.rsc.org/suppdata/nj/b2/b203861g/
Source: Royal Society of Chemistry journal article supplement (doi:10.1039/b203861g), 2003-03-25
Supplement: b203861g.doc [file b203861g.doc]

ELECTRONIC SUPPLEMENTARY INFORMATION for
**Theoretical study of the reaction mechanism of the uncatalyzed epoxidation of alkenes by iodosylbenzene**,
*Guada Barea, Feliu Maseras, Agustí Lledós*

**Table S1:**  Optimized B3LYP/I geometry (Cartesian coordinates, Å) for **1**. Total energy (E(RB+HF-LYP)): -164.464988284 atomic units.

| C | 1.246404 | 0.167076 | -0.108848 |
| --- | --- | --- | --- |
| C | 1.119255 | -0.959124 | 0.575978 |
| H | 2.156960 | 0.668998 | -0.419123 |
| I | -0.589347 | 1.108509 | -0.669839 |
| O | -1.793034 | -0.102056 | 0.072577 |
| H | 1.991432 | -1.516325 | 0.909263 |
| H | 0.127364 | -1.343496 | 0.815334 |

**Table S2:**  Optimized B3LYP/I geometry (Cartesian coordinates, Å) for **2**. Total energy (E(RB+HF-LYP)): -78.5858246983 atomic units.

| C | 0.665612 | 0.000000 | -0.000047 |
| --- | --- | --- | --- |
| C | -0.665612 | 0.000000 | -0.000048 |
| H | 1.240053 | -0.923407 | 0.000143 |
| H | 1.240053 | 0.923407 | 0.000142 |
| H | -1.240052 | -0.923407 | 0.000143 |
| H | -1.240053 | 0.923407 | 0.000144 |

**Table S3:**  Optimized B3LYP/I geometry (Cartesian coordinates, Å) for **3**. Total energy (E(RB+HF-LYP)): -89.3720401586 atomic units.

| C | 0.522323 | 0.082095 | -0.052614 |
| --- | --- | --- | --- |
| C | 0.430412 | -1.050154 | 0.635531 |
| H | 1.463661 | 0.539396 | -0.335319 |
| I | -1.143121 | 1.190796 | -0.717189 |
| H | 1.338122 | -1.565553 | 0.943764 |
| H | -0.516348 | -1.501061 | 0.914380 |

**Table S4:**  Optimized B3LYP/I geometry (Cartesian coordinates, Å) for **4**. Total energy (E(RB+HF-LYP)): -153.783340948 atomic units.

| C | 0.734691 | -0.000015 | -0.371475 |
| --- | --- | --- | --- |
| C | -0.734705 | -0.000014 | -0.371447 |
| H | 1.274810 | 0.920713 | -0.594523 |
| H | 1.274809 | -0.920760 | -0.594452 |
| H | -1.274833 | -0.920759 | -0.594401 |
| H | -1.274832 | 0.920714 | -0.594474 |
| O | 0.000017 | 0.000033 | 0.854422 |

**Table S5:**  Optimized B3LYP/I geometry (Cartesian coordinates, Å) for **5**. Total energy (E(RB+HF-LYP)): -243.038517619 atomic units.

| C | .659134 | -.647947 | -2.294620 |
| --- | --- | --- | --- |
| C | -.678168 | -.847768 | -2.234101 |
| H | 1.085840 | .348657 | -2.339445 |
| H | 1.355032 | -1.477117 | -2.360516 |
| H | -1.104411 | -1.845039 | -2.236755 |
| H | -1.378292 | -.018811 | -2.217211 |
| O | .149901 | -.819666 | -.218890 |
| I | .351822 | -.878605 | 1.852455 |
| C | -.036588 | 1.175801 | 2.214065 |
| C | -.294531 | 1.954427 | 1.173546 |
| H | .000807 | 1.469426 | 3.257386 |
| H | -.499574 | 3.013878 | 1.310060 |
| H | -.303719 | 1.537220 | .168780 |

**Table S6:**  Optimized B3LYP/I geometry (Cartesian coordinates, Å) for **6**. Total energy (E(RB+HF-LYP)): -405.408864081 atomic units.

| C | -1.069919 | 1.460535 | -0.461318 |
| --- | --- | --- | --- |
| C | -2.084265 | 2.306227 | -0.384027 |
| I | 0.832540 | 1.892875 | 0.391697 |
| O | 0.111659 | 3.809871 | 0.822328 |
| O | 1.391232 | -0.028550 | -0.145833 |
| I | 0.763087 | -1.694290 | 0.930025 |
| C | -0.042391 | -2.438462 | -0.888038 |
| C | 0.181605 | -1.865497 | -2.060507 |
| H | -1.046885 | 0.483425 | -0.930473 |
| H | -3.041855 | 2.046844 | -0.830421 |
| H | -1.979206 | 3.257999 | 0.129045 |
| H | -0.615681 | -3.330578 | -0.660445 |
| H | 0.795117 | -0.972384 | -2.135488 |
| H | -0.246652 | -2.294488 | -2.964110 |
| H | 0.264360 | 4.357702 | 0.032588 |
| O | 0.007001 | -3.477821 | 1.725930 |
| H | 0.712090 | -4.143438 | 1.651186 |

**Table S7:**  Optimized B3LYP/I geometry (Cartesian coordinates, Å) for **7**. Total energy (E(RB+HF-LYP)): -483.995909548 atomic units.

| C | 1.670020 | -2.141724 | 0.749057 |
| --- | --- | --- | --- |
| C | 0.660263 | -2.484246 | 1.530876 |
| I | 1.829442 | -0.234320 | -0.176087 |
| O | 3.716511 | -0.927575 | -0.746576 |
| O | -0.035261 | 0.274512 | 0.591866 |
| I | -1.766835 | -0.132054 | -0.523856 |
| C | -2.794276 | -0.025913 | 1.327250 |
| C | -2.218824 | 0.336767 | 2.463088 |
| H | 2.558574 | -2.709483 | 0.496188 |
| H | 0.644200 | -3.469078 | 1.992416 |
| H | -0.157524 | -1.801144 | 1.734752 |
| H | -3.823715 | -0.314004 | 1.144241 |
| H | -1.167602 | 0.602643 | 2.504269 |
| H | -2.811160 | 0.369425 | 3.375460 |
| H | 3.624784 | -1.294104 | -1.642562 |
| O | -3.659065 | -0.533559 | -1.312198 |
| H | -4.052391 | 0.322300 | -1.554431 |
| C | 0.505993 | 3.710823 | 0.118041 |
| C | 1.715975 | 4.175550 | 0.427259 |
| H | -0.199708 | 4.309617 | -0.454866 |
| H | 0.178297 | 2.717184 | 0.417441 |
| H | 2.425938 | 3.584230 | 1.001545 |
| H | 2.049795 | 5.165643 | 0.124379 |

**Table S8:**  Optimized B3LYP/I geometry (Cartesian coordinates, Å) for **8**. Total energy (E(RB+HF-LYP)): -483.917000089 atomic units.

| C | 2.437401 | -1.376012 | .917934 |
| --- | --- | --- | --- |
| I | 2.086251 | -.518445 | -1.002518 |
| O | .313789 | .960494 | .218461 |
| I | -1.453805 | -.562514 | -1.012298 |
| O | -3.386548 | -1.361857 | -1.722685 |
| C | 1.808010 | -1.013012 | 2.022740 |
| O | 3.905117 | -1.637276 | -1.449731 |
| C | -2.569831 | .339800 | .575629 |
| C | -3.890463 | .283778 | .605560 |
| C | .376943 | 2.356023 | -.189950 |
| C | .427663 | 2.764185 | 1.194501 |
| H | 3.231294 | -2.103009 | .787967 |
| H | 2.067221 | -1.500085 | 2.961053 |
| H | 1.049045 | -.237715 | 2.029813 |
| H | -1.887475 | .807320 | 1.271941 |
| H | -4.441613 | -.223918 | -.182264 |
| H | -4.429018 | .753931 | 1.426443 |
| H | 3.589650 | -2.381631 | -1.994190 |
| H | -3.443354 | -2.232657 | -1.286091 |
| H | -.520124 | 2.648481 | -.747288 |
| H | 1.276300 | 2.555664 | -.784996 |
| H | 1.368841 | 2.762923 | 1.731064 |
| H | -.485087 | 2.897948 | 1.763419 |

**Table S9:**  Optimized B3LYP/I geometry (Cartesian coordinates, Å) for **9**. Total energy (E(RB+HF-LYP)): -483.996040806 atomic units.

| C | 1.767775 | -0.917858 | -1.305639 |
| --- | --- | --- | --- |
| I | 0.333188 | -2.508388 | -1.358953 |
| O | 0.609337 | 1.464692 | 0.389459 |
| I | -2.140726 | -0.448950 | -0.425990 |
| O | -3.545363 | 1.151052 | 0.678110 |
| C | 2.587422 | -0.787633 | -0.244158 |
| O | 2.407536 | -3.505489 | -1.890429 |
| C | -1.292799 | -0.560430 | 1.565977 |
| C | -1.499712 | 0.400651 | 2.473275 |
| C | -0.136643 | 2.738381 | 0.600981 |
| C | 0.881430 | 2.647351 | -0.474599 |
| H | 1.792255 | -0.358036 | -2.249847 |
| H | 3.390507 | -0.032097 | -0.283994 |
| H | 2.512989 | -1.411883 | 0.658220 |
| H | -0.729319 | -1.496093 | 1.675462 |
| H | -2.118639 | 1.285195 | 2.270545 |
| H | -1.073590 | 0.268059 | 3.482879 |
| H | 2.244318 | -4.387688 | -2.299198 |
| H | -4.320212 | 1.274302 | 0.083338 |
| H | 0.115595 | 3.249086 | 1.542223 |
| H | -1.207825 | 2.680951 | 0.347351 |
| H | 0.555168 | 2.527210 | -1.518423 |
| H | 1.874598 | 3.097553 | -0.326094 |
